# Supplementary material
Source: PubMed Central journal article supplement (PMC3003360)
Supplement: supp_M110.183616_jbc.M110.183616-1.pdf [file supp_M110.183616_jbc.M110.183616-1.pdf]

# Supplemental Figure 1

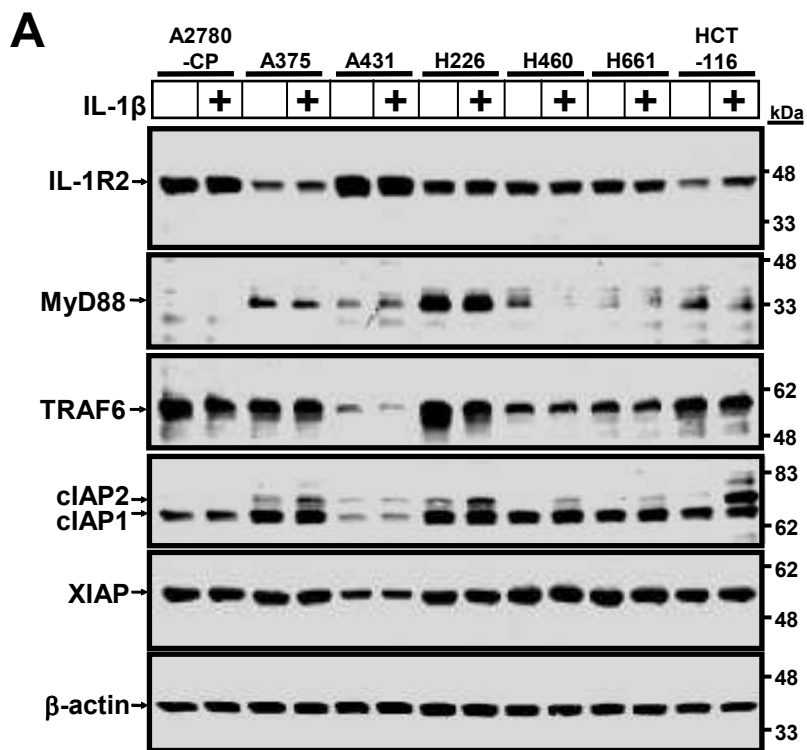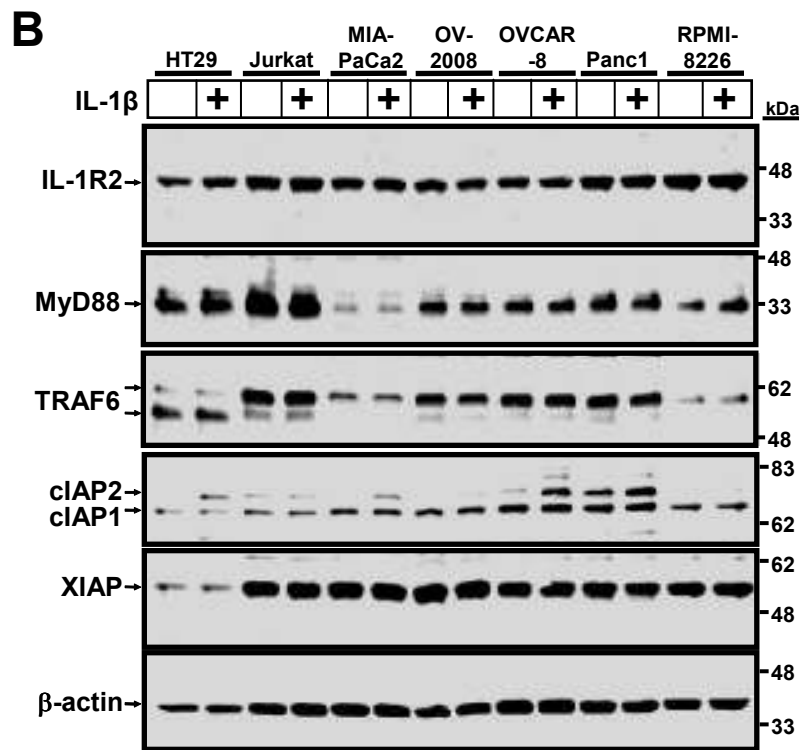

# Supplemental Figure 2

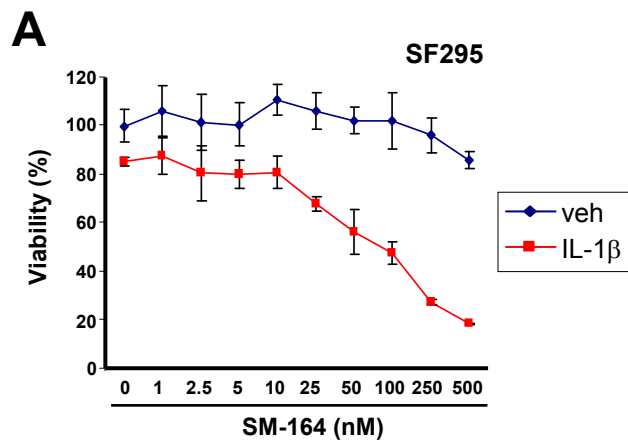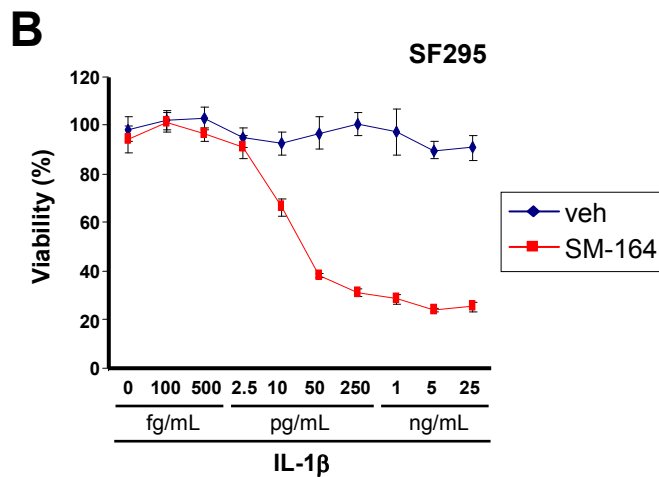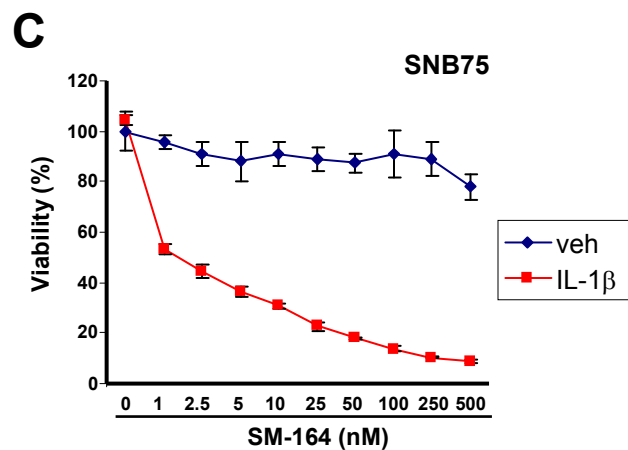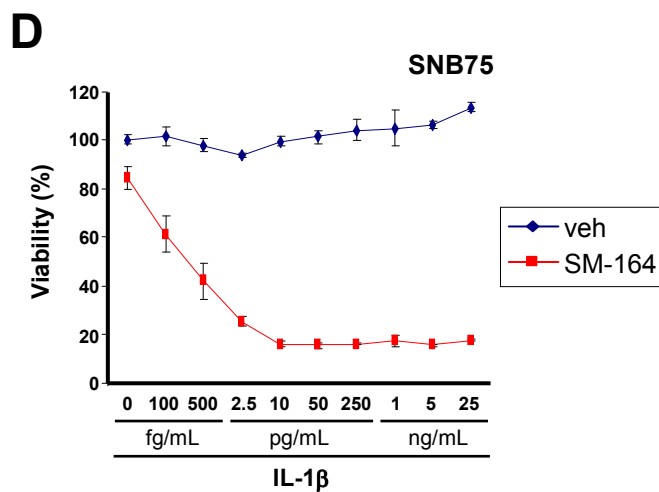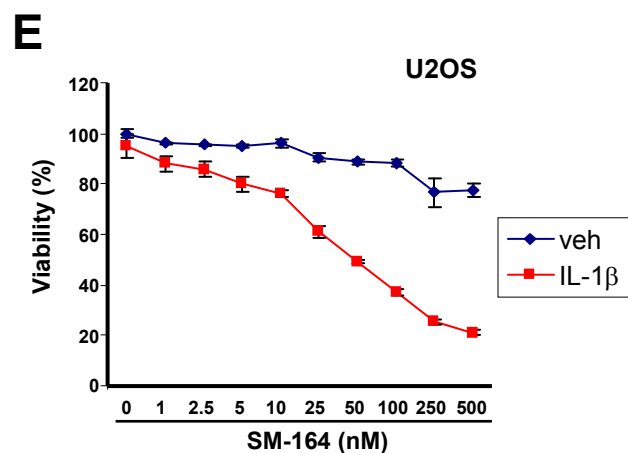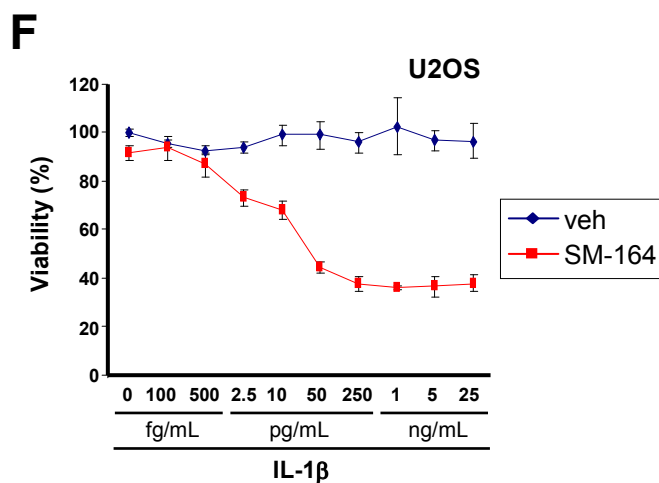

# Supplemental Figure 3

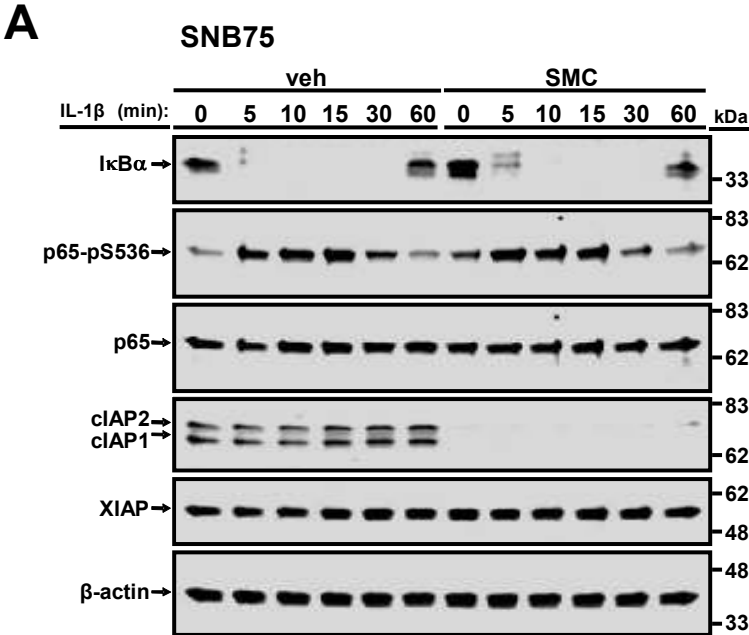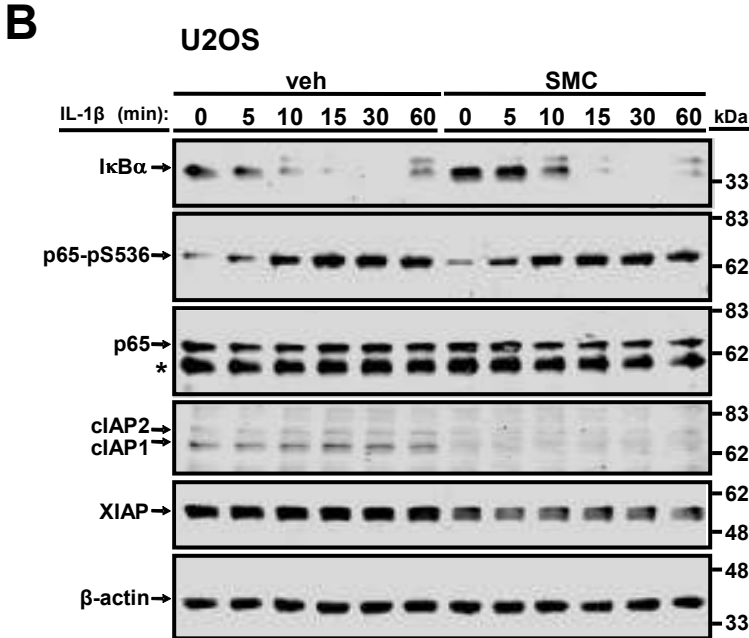

# Supplemental Figure 4

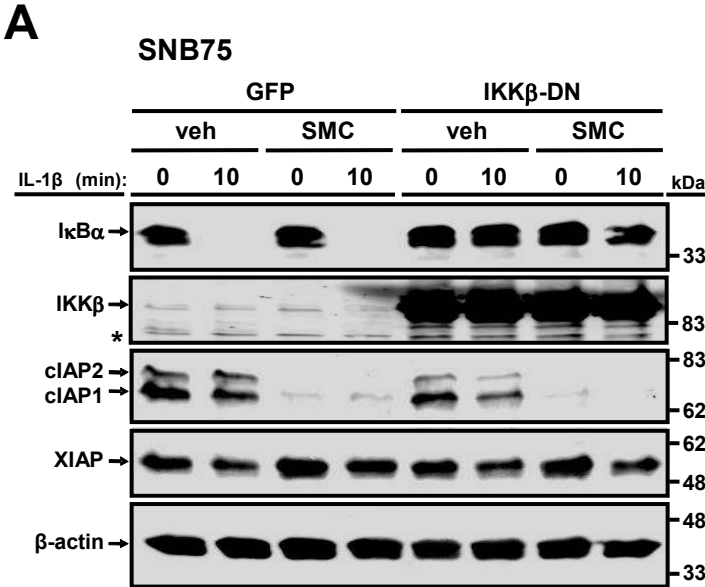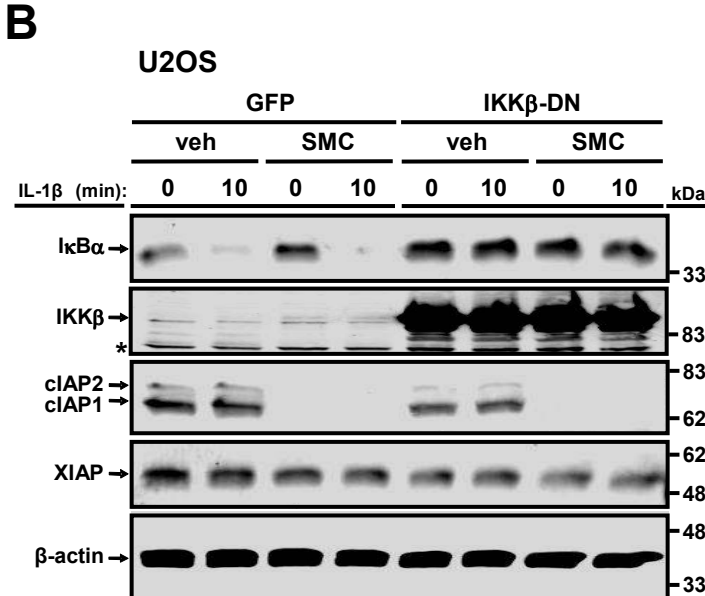

# Supplemental Figure 5

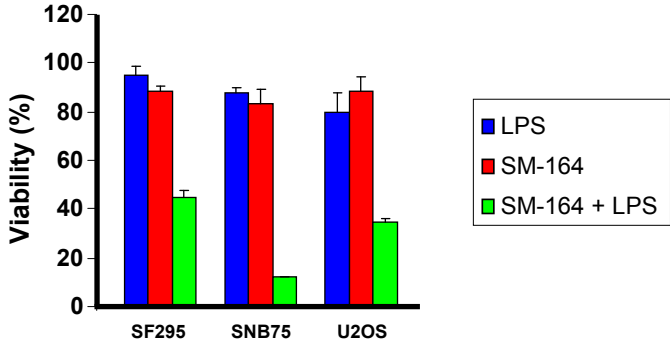

## SUPPLEMENTAL FIGURE LEGENDS

Supplemental Fig. 1. Expression of IL-1R2 in cancer cell lines. (A,B) Cancer cell lines from the panel were treated with 1ng/mL IL-1 $\beta$  for 24h. Proteins were isolated and Western immunoblotted with antibodies recognizing IL-1R2, cIAP1, cIAP2 and XIAP.  $\beta$ -actin was used as a loading control.

Supplemental Fig. 2. Dosage response of cancer cell lines to SM-164 and IL-1 $\beta$  treatment. (A) SF295, (C) SNB75 and (E) U2OS cells were treated with 1ng/mL IL-1 $\beta$  in the presence of varying concentrations of SM-164 for 48h. (B) SF295, (D) SNB75 and (F) U2OS cells were treated with 100nM SM-164 in the presence of varying concentrations IL-1 $\beta$  for 48h. Cell viability was determined by Alamar Blue. The percentage viability relative to vehicle  $\pm$  SD (n = 4) was plotted.

Supplemental Fig. 3. SMC treatment does not impair IL-1 $\beta$ -mediated activation of the NF- $\kappa$ B pathway. (A) SNB75 and (B) U2OS cells were treated with vehicle (veh) or 100nM SM-164 (SMC) for 2h, then treated with 1ng/mL IL-1 $\beta$  for the indicated times, and protein extracts were immunoblotted for I $\kappa$ B $\alpha$ , p65-pS536, p65, cIAP1, cIAP2 and XIAP.  $\beta$ -actin was used as a loading control. Asterisk denotes a non-specific band.

Supplemental Fig. 4. Expression of dominant negative IKK $\beta$  blocks IL-1 $\beta$ -mediated activation of the NF- $\kappa$ B pathway. (A) SNB75 and (B) U2OS cells were transduced with adenoviral vectors expressing GFP or co-expressing GFP and a dominant negative form of IKK $\beta$  (IKK $\beta$ -DN) at an MOI of 100 (SNB75) or 50 (U2OS) for 24h. Cells were

treated with vehicle (veh) or 100nM SM-164 (SMC) for 2h, and then treated with 1ng/mL IL-1 $\beta$  for 10min. Cells were harvested and the protein expression levels of I $\kappa$ B $\alpha$ , IKK $\beta$ , cIAP1, cIAP2 and XIAP were analysed by Western immunoblotting.  $\beta$ -actin was used as a loading control. Asterisk denotes a non-specific band.

Supplemental Fig. 5. LPS synergizes with SM-164 to induce cancer cell death. SF295, SNB75 and U2OS cells were treated with combinations of 1 $\mu$ g/mL LPS and 100nM SM-164 for 48h. Cell viability was measured with Alamar Blue. Percentage viability relative to vehicle +/- SD (n = 4) was plotted.
